# Supplementary material for: Characterization of a Novel Orthomyxo-like Virus Causing Mass Die-Offs of Tilapia
Source: PubMed Central journal article supplement (PMC4959514; doi:10.1128/mbio.00431-16), 2016-04-05
Supplement: mbo002162777sf1.pdf [file mbo002162777sf1.pdf]

Figure S1.

```

TiLV-Segment-1-RDRP      1  ----MWAFOEG-----VCKGNLLSGPTSMKAPDSA-----ARESLDRASEI  37
                          F      +      +GP M S      +R S+++ S++
Influenza c virus-PB1    1  MEINPYLMFLNNDVTSLISTTYPYTGP PPM SHGSSTKYTLETIKRTYDYSRTSVEKTSKV  60

TiLV-Segment-1-RDRP     38  MT-----GKSYNAVHTGDL SKLPN-----QGESPLRIVDS DLYSE----  72
                          K V G L L      GE + + +E
Influenza c virus-PB1    61  FNIPRRKFCNCLEDKNELVKPTGNVDIGSLGLAEMMEKRMGE GFFKHCVMEAE TEILKM  120

TiLV-Segment-1-RDRP     73  -----RSCCWVIEKEG-----RVVCKSTTLTRG-MTGLLNTTRC SPSSELI----  112
                          ++ W E+      ++ + T G G      C+ E++
Influenza c virus-PB1    121  HFSRLTEGRQTYDWT SERNMPAATALQLTVDAIKETEGPFKGT TML EYCNKMIEMLDWKE  180

TiLV-Segment-1-RDRP    113  CKVLTVESLSEK-----IGDTSVEELLSHG RYFKALRDQ ERGKPKS  154
                          K V+++ +      I +E L      +D ERGK +
Influenza c virus-PB1    181  IKFRKVKTMVRREKDKRSGKEIKTKVPVMGIDS IKHDEF LIRALTINTMAKDGERGK LQR  240

TiLV-Segment-1-RDRP    155  RAI FL SH PFFRLLSSV VETHARSVLSKVS AVYTATASAEQRAMMAAQVVESRKHV-----  209
RAI      R S +VET A+ + K+      E++A + V      +
Influenza c virus-PB1    241  RAIATPGMIVRPFSKIVETVAQKICEKLKESGLPVGGNEKAKLKT TVTSLNARMNSDQF  300

TiLV-Segment-1-RDRP    210  ---LNGDCTKYNEAIDAD TLLKVWDAIGMSI-----GVMLA  243
      + GD +K+NE      + L + I S      G+ L+
Influenza c virus-PB1    301  AVNITGDN SKWNECQPEAYLALLAYITKDSSDLMKDLCSVAPV LFCNK FVKLGQ GIRLS  360

TiLV-Segment-1-RDRP    244  YMVRRCVLIK-----DTLVE-----C-- PGGMLMGMFNATAT--  274
      + K V+IK      L E      C PGGMLMGMFN +T
Influenza c virus-PB1    361  NKRKTKEV I IKA EKMGKYKNLMREEYKNLFE PLEKYIQKDVCF L PGGMLMGMFNMLSTVL  420

TiLV-Segment-1-RDRP    275  -----LALQGTDRFLSF SDDFITSFN SPAELREIEDLL---FASCH---NLS  316
                          L +G L SDDF+ F + I + A C N+S
Influenza c virus-PB1    421  GVSTLCYMDEELKAKGCFW TGLQSSDDFVL-FAVASNWSNIHWT IRRFNAVCKLIGINMS  479

TiLV-Segment-1-RDRP    317  LKKSYSIVASLEINSCT LTRDGLATGL-----GCTAGV PFRGPLVTLKQTAAML  366
L+KSY S+ L      ++ DG+ + L      G GV F + +K
Influenza c virus-PB1    480  LEKSYGSLPEL-FEFTSMFF DGEFVSNLAMELPAFTTAGVNE GVDFTAAMSIIKTNMINN  538

TiLV-Segment-1-RDRP    367  SGAVD SGVMPFHS AERLFQIKQEQEAYR-----YNNPTYTTRNEDFLPTCLGGKT  416
S + + +M      + F+ + +      N T N+D L GGK
Influenza c virus-PB1    539  SLSPSTALMALRICLQEF RAYRVHPWDSRVKGGRMKIINEFIKT IENKDGLLIADGGKL  598

TiLV-Segment-1-RDRP    417  VISFQSL-----LTWD-----CHPF-----WYQVHPD GPD TIDQK--V  447
+ + +L      L ++      +PF      ++ H GP +++ V
Influenza c virus-PB1    599  MNNISTLHIPEEVLKFEK MDEQYRNRVFNPKNPFTNF DKTIDIFRAH--GPIRVEENEAV  656

TiLV-Segment-1-RDRP    448  LSVLASKTRRRRTRLEA-----LSDL DPLVPHRLLVSESDV  483
+S + +TR RT L      +D++P P + +
Influenza c virus-PB1    657  VSTHSFRTRANRTLLNTDMRAMMAEEKRYQMVC DIFKSVFESADINP--PIGAMSIG EAI  714

TiLV-Segment-1-RDRP    484  SKIRAAQAHLKSLGLEQPTNFNYAIYKAVOPTAGC-----  519
      + R + +G + + + I ++
Influenza c virus-PB1    715  EEKLLERAKMKRDIGAIEDSEYE-EIKDIIRDAKKARLES R  754

```
